# Supplementary material for: Genome-Wide Identification of QTLs for Grain Protein Content Based on Genotyping-by-Resequencing and Verification of qGPC1-1 in Rice
Source: MDPI journal article supplement (doi:10.3390/ijms21020408), 2020-01-09
Supplement: s1 [file s1]

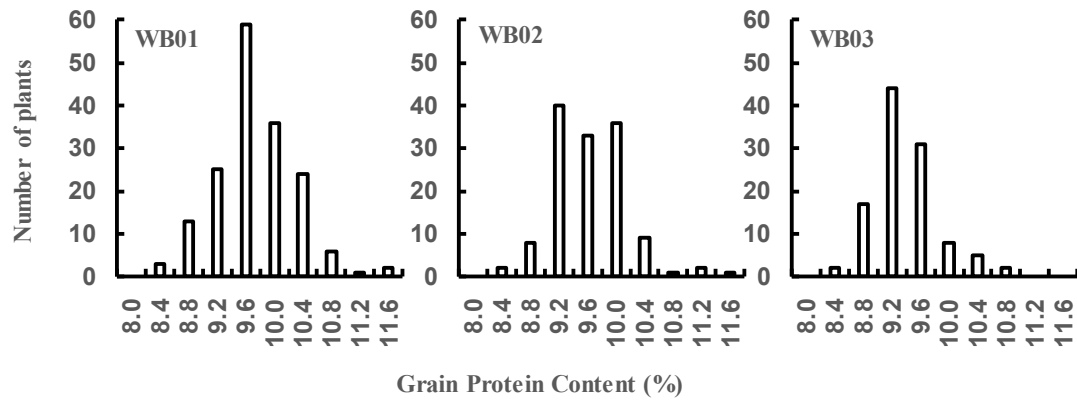

**Figure S1.** Frequency distributions of grain protein content in three residual heterozygote derived F<sub>2</sub> populations.

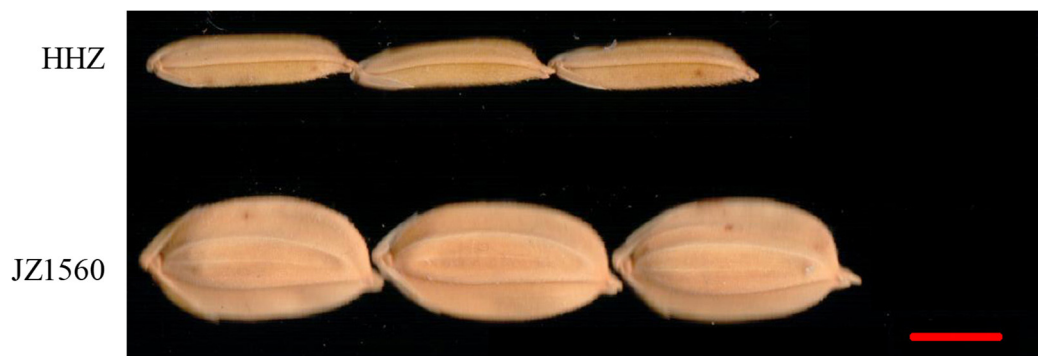

**Figure S2.** Parental grains. Scale bar, 5 mm. HHZ, huanghuazhan; JZ1560, JiZi1560.

**Table S1.** QTLs for grain protein content (GPC) based on the low-density genetic map containing 208 SSR and Indel markers in the recombinant inbred line (RIL) population.

| QTL            | Year | Method | Marker Interval | Position | LOD   | A     | R <sup>2</sup> (%) |
|----------------|------|--------|-----------------|----------|-------|-------|--------------------|
|                |      |        |                 | (cM)     |       |       |                    |
| <i>qGPC1</i>   | 2016 | NIRS   | JD1006-JD1007   | 37.11    | 8.30  | 0.71  | 12.40              |
|                | 2016 | KND    |                 | 38.11    | 9.06  | 0.64  | 13.33              |
|                | 2017 | NIRS   |                 | 38.11    | 7.24  | 0.62  | 11.78              |
|                | 2017 | KND    |                 | 38.11    | 8.07  | 0.54  | 12.87              |
| <i>qGPC2-1</i> | 2016 | NIRS   | RM6-JD2008      | 127.81   | 2.85  | -0.36 | 3.52               |
|                | 2016 | KND    |                 | 127.81   | 2.66  | -0.30 | 3.24               |
| <i>qGPC2-2</i> | 2017 | NIRS   | W004-RM12987    | 47.61    | 2.28  | 0.28  | 2.90               |
| <i>qGPC3-1</i> | 2016 | NIRS   | JD3002-JD3011   | 2.91     | 10.75 | 0.68  | 12.74              |
|                | 2016 | KND    |                 | 2.91     | 11.37 | 0.60  | 12.99              |
|                | 2017 | NIRS   |                 | 2.91     | 4.94  | 0.43  | 6.06               |
|                | 2017 | KND    |                 | 2.91     | 7.33  | 0.43  | 9.08               |
| <i>qGPC3-2</i> | 2017 | NIRS   | RM3131-JD3005   | 35.61    | 3.45  | 0.57  | 6.62               |
|                | 2017 | KND    |                 | 35.61    | 3.89  | 0.49  | 6.91               |
| <i>qGPC3-3</i> | 2016 | NIRS   | RM2453-RM7370   | 80.91    | 2.58  | 0.34  | 2.88               |
| <i>qGPC3-4</i> | 2017 | NIRS   | RM2334-RM3525   | 114.31   | 5.16  | 0.53  | 10.09              |
|                | 2017 | KND    |                 | 114.31   | 5.35  | 0.46  | 10.49              |
| <i>qGPC4-1</i> | 2016 | NIRS   | RM2636-RM5511   | 99.71    | 3.15  | 0.40  | 4.51               |
|                | 2016 | KND    |                 | 102.71   | 4.12  | 0.41  | 6.13               |
| <i>qGPC4-2</i> | 2017 | NIRS   | RM5511-RM1113   | 112.81   | 2.49  | 0.32  | 3.64               |
|                | 2017 | KND    |                 | 113.81   | 2.92  | 0.30  | 4.62               |
| <i>qGPC5</i>   | 2016 | NIRS   | JD5014-JD5015   | 95.41    | 4.02  | 0.41  | 4.61               |
|                | 2016 | KND    |                 | 103.11   | 2.65  | 0.30  | 3.25               |
|                | 2017 | NIRS   |                 | 103.11   | 5.87  | 0.48  | 8.35               |
|                | 2017 | KND    |                 | 103.11   | 4.42  | 0.35  | 6.22               |
| <i>qGPC7</i>   | 2016 | NIRS   | RM2966-RM3826   | 53.31    | 3.26  | 0.38  | 3.91               |
|                | 2016 | KND    |                 | 53.31    | 2.92  | 0.31  | 3.35               |
| <i>qGPC8-1</i> | 2016 | NIRS   | RM1148-RM5556   | 28.11    | 6.04  | -0.53 | 7.60               |
|                | 2016 | KND    |                 | 31.11    | 5.08  | -0.41 | 5.96               |
| <i>qGPC10</i>  | 2016 | NIRS   | RM6745-RM2371   | 66.21    | 2.23  | -0.32 | 2.90               |
| <i>qGPC11</i>  | 2017 | NIRS   | RM3133-RM5731   | 25.41    | 2.13  | -0.31 | 3.32               |

Position-cM, position of peak marker in cent-Morgan within the interval. A, additive effect of replacing a maternal allele with a paternal allele. R<sup>2</sup>(%), proportion of the phenotypic variation explained by the QTL.

**Table S2.** Sequences and physical location of the markers.

| <b>Marker</b> | <b>Physical Position (bp)</b> | <b>Forward Primer</b> | <b>Reverse Primer</b> |
|---------------|-------------------------------|-----------------------|-----------------------|
| JD1037        | 4995417-4995893               | CTCCAATAAAATAGCCCACG  | TGCAACAGTTCAACACCAGC  |
| JD1068        | 6270413-6270652               | GGAGACCCGGAGAATTACTT  | CATTTCCCTAGACCCTAGCA  |
| JD1038        | 6515343-6515581               | GTTTACGGAATAAGCCAAAC  | CCACAGTGCTCATCAAAGAG  |
| JD1075        | 6835475-6835823               | TGTTTCTCTCTTGGCTTTGC  | TCCCTTTCCCTTCTCTTGTC  |
| JD1078        | 7175852-7176049               | TCTAAAAGCCTCAACCACTA  | CTCTTCTTCATCTCCTCCAT  |
| JD1017        | 8452950-8453295               | TATCCCACCCGATACCTGC   | AATAGCCTCCCGCTTCCTT   |

Physical position of the marker according to the Nipponbare reference database in Rice Release 7.
